# Supplementary material for: Understanding the risk of breast cancer from population and geographic perspective
Source: Research Square preprint supplement (doi:10.21203/rs.3.rs-5426841/v1), 2024-11-28
Supplement: Supplementary file 1 [file c0fcc227e17da9b410b22df4.docx]

**Appendix Table A1. Four indicators of breast cancer by state in the United States**

| **State** | **Count** | **P rate**  **(per 100,000 pop)** | **G rate**  **(Per 1000 km2)** | **PG rate**  **(per 100,000 pop 1000 km2)** |
| --- | --- | --- | --- | --- |
| Alabama | 17600 | 540 | 134 | 4 |
| Alaska | 2300 | 630 | 2 | 0 |
| Arizona | 30200 | 610 | 103 | 2 |
| Arkansas | 10600 | 520 | 79 | 4 |
| California | 125300 | 520 | 310 | 1 |
| Colorado | 17700 | 610 | 66 | 2 |
| Connecticut | 15100 | 570 | 1203 | 45 |
| Delaware | 4000 | 590 | 790 | 117 |
| Florida | 105600 | 630 | 756 | 5 |
| Georgia | 33000 | 560 | 220 | 4 |
| Hawaii | 5600 | 640 | 337 | 38 |
| Idaho | 5100 | 520 | 24 | 2 |
| Illinois | 46400 | 570 | 322 | 4 |
| Indiana | 22300 | 550 | 240 | 6 |
| Iowa | 11700 | 540 | 81 | 4 |
| Kansas | 11200 | 610 | 53 | 3 |
| Kentucky | 15000 | 510 | 146 | 5 |
| Louisiana | 16000 | 530 | 142 | 5 |
| Maine | 6200 | 580 | 78 | 7 |
| Maryland | 26400 | 670 | 1043 | 26 |
| Massachusetts | 28100 | 590 | 1384 | 29 |
| Michigan | 43500 | 650 | 296 | 4 |
| Minnesota | 20100 | 560 | 97 | 3 |
| Mississippi | 11300 | 570 | 93 | 5 |
| Missouri | 23600 | 570 | 132 | 3 |
| Montana | 4300 | 560 | 11 | 1 |
| Nebraska | 6900 | 590 | 35 | 3 |
| Nevada | 9600 | 480 | 34 | 2 |
| New Hampshire | 5600 | 550 | 241 | 24 |
| New Jersey | 34900 | 540 | 1817 | 28 |
| New Mexico | 8200 | 560 | 26 | 2 |
| New York | 69700 | 520 | 570 | 4 |
| North Carolina | 37900 | 590 | 300 | 5 |
| North Dakota | 2700 | 580 | 15 | 3 |
| Ohio | 45600 | 580 | 430 | 5 |
| Oklahoma | 15200 | 630 | 85 | 4 |
| Oregon | 17000 | 660 | 68 | 3 |
| Pennsylvania | 52100 | 560 | 449 | 5 |
| Rhode Island | 4300 | 540 | 1589 | 200 |
| South Carolina | 18500 | 560 | 237 | 7 |
| South Dakota | 2900 | 530 | 15 | 3 |
| Tennessee | 25500 | 590 | 239 | 6 |
| Texas | 79200 | 530 | 117 | 1 |
| Utah | 8200 | 630 | 39 | 3 |
| Vermont | 2800 | 550 | 117 | 23 |
| Virginia | 35300 | 660 | 344 | 6 |
| Washington | 28200 | 630 | 164 | 4 |
| West Virginia | 7200 | 530 | 115 | 8 |
| Wisconsin | 25700 | 660 | 183 | 5 |
| Wyoming | 2600 | 670 | 10 | 3 |
